# Supplementary material for: Heterogeneity of human anti-viral immunity shaped by virus, tissue, age, and sex
Source: PubMed Central journal article supplement — Cell Rep. Author manuscript; Available in PMC 2021 Dec 31. (PMC8719595; doi:10.1016/j.celrep.2021.110071), 2021-11-30
Supplement: NIHMS1760955-supplement-1.pdf [file NIHMS1760955-supplement-1.pdf]

**Supplemental information**

**Heterogeneity of human anti-viral immunity**

**shaped by virus, tissue, age, and sex**

**Maya M.L. Poon, Eve Byington, Wenzhao Meng, Masaru Kubota, Rei Matsumoto, Alba Grifoni, Daniela Weiskopf, Pranay Dogra, Nora Lam, Peter A. Szabo, Basak Burcu Ural, Steven B. Wells, Aaron M. Rosenfeld, Maigan A. Brusko, Todd M. Brusko, Thomas J. Connors, Alessandro Sette, Peter A. Sims, Eline T. Luning Prak, Yufeng Shen, and Donna L. Farber**

**A**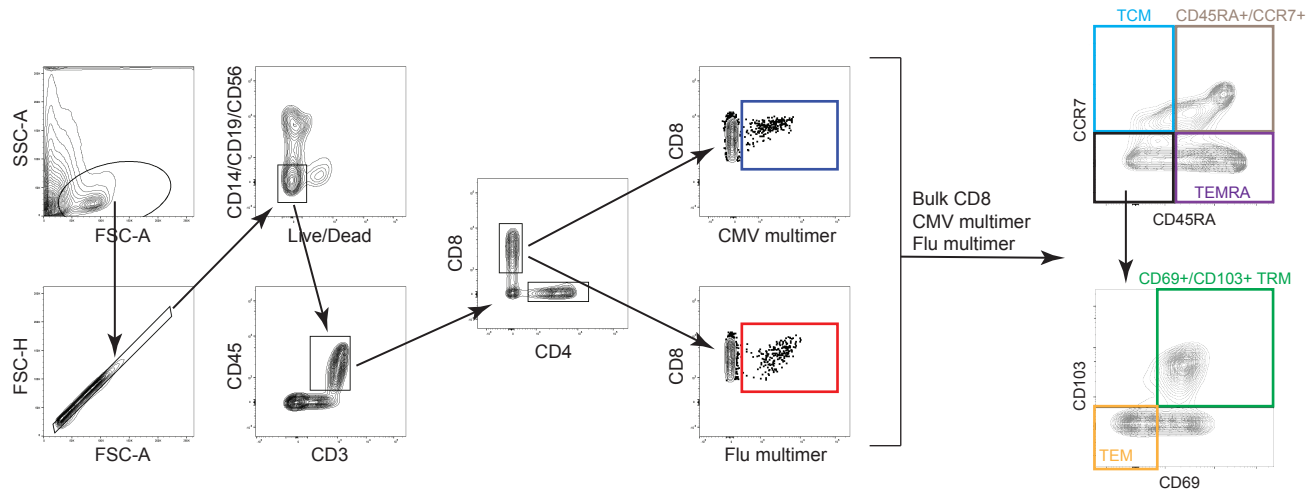**B**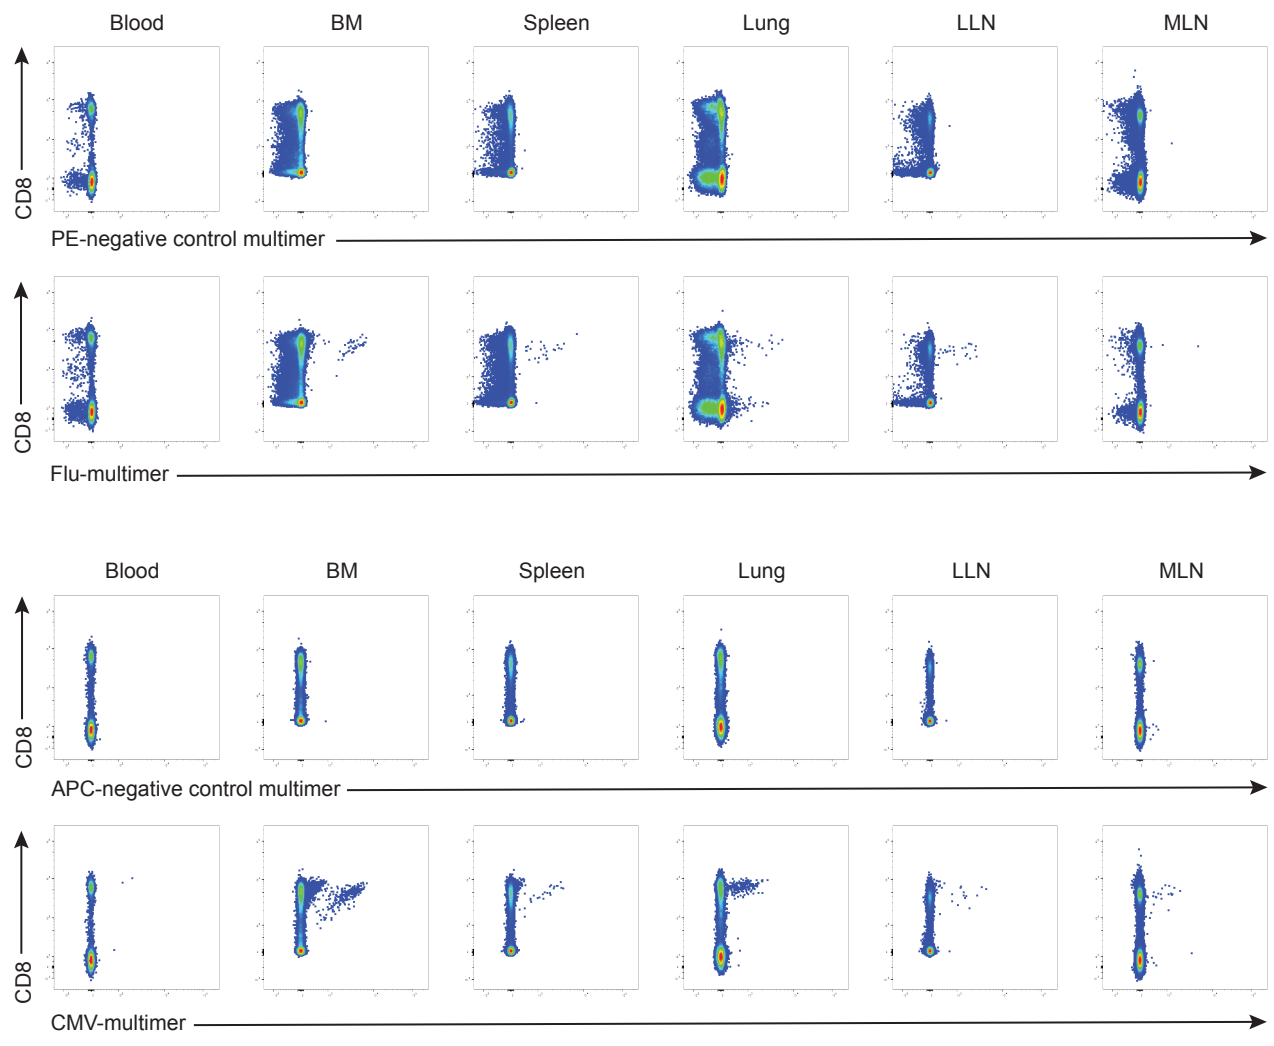

**Figure S1. Gating strategy and controls for flow cytometry analysis. Related to Figures 1-6.** (A) Gating strategy for multimer<sup>+</sup> virus-specific CD8<sup>+</sup> T cells gated on live CD45<sup>+</sup>CD14<sup>-</sup>CD19<sup>-</sup>CD56<sup>-</sup>CD3<sup>+</sup>CD4<sup>-</sup> T cells. Flu- and CMV-specific CD8<sup>+</sup> T cells and bulk CD8<sup>+</sup> T cells were further characterized based on expression of phenotypic markers CD45RA, CCR7, CD69, and CD103 to identify T cell subsets, gated as shown. (B) Representative flow cytometry plots showing staining using negative control multimer reagents and virus-specific multimer reagents for Flu (top) and CMV (bottom). BM, bone marrow; LLN, lung-draining lymph node; MLN, mesenteric lymph node.

**A**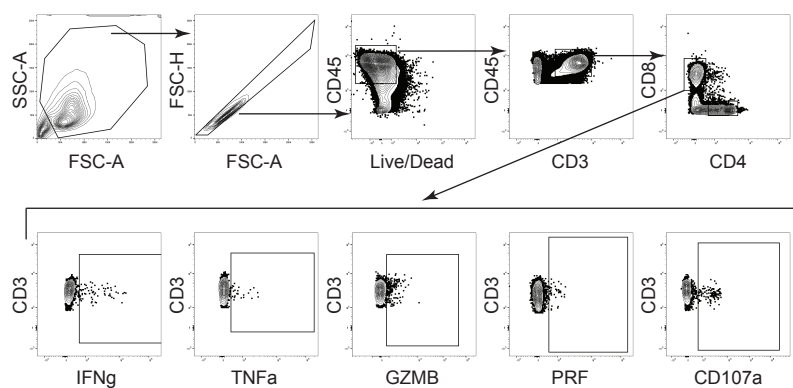**B**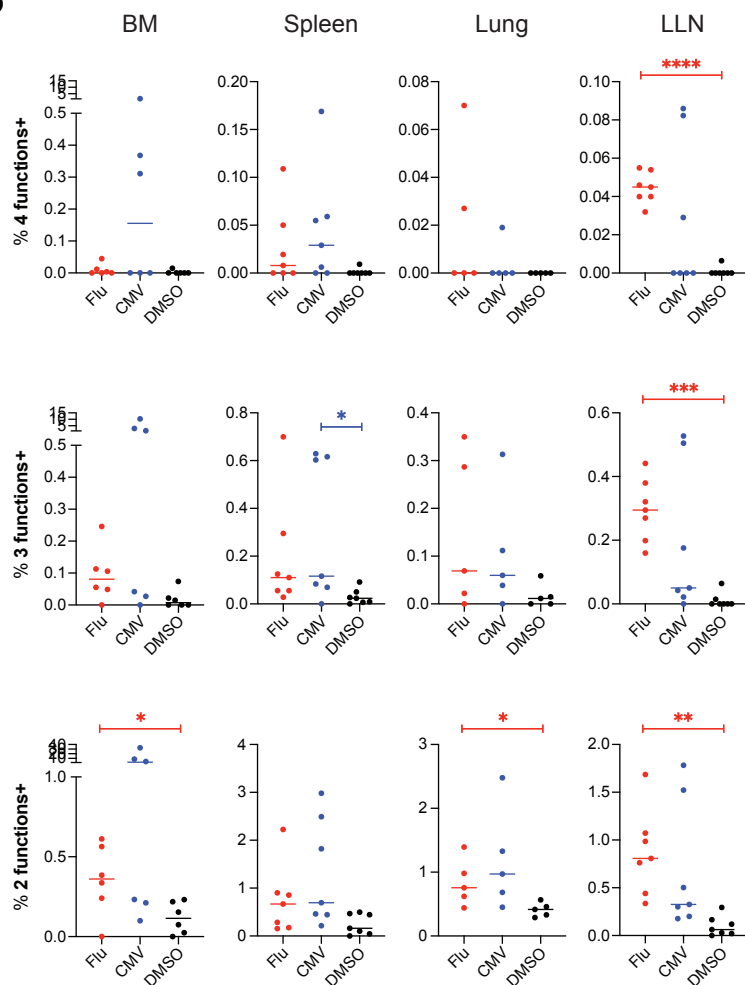**C**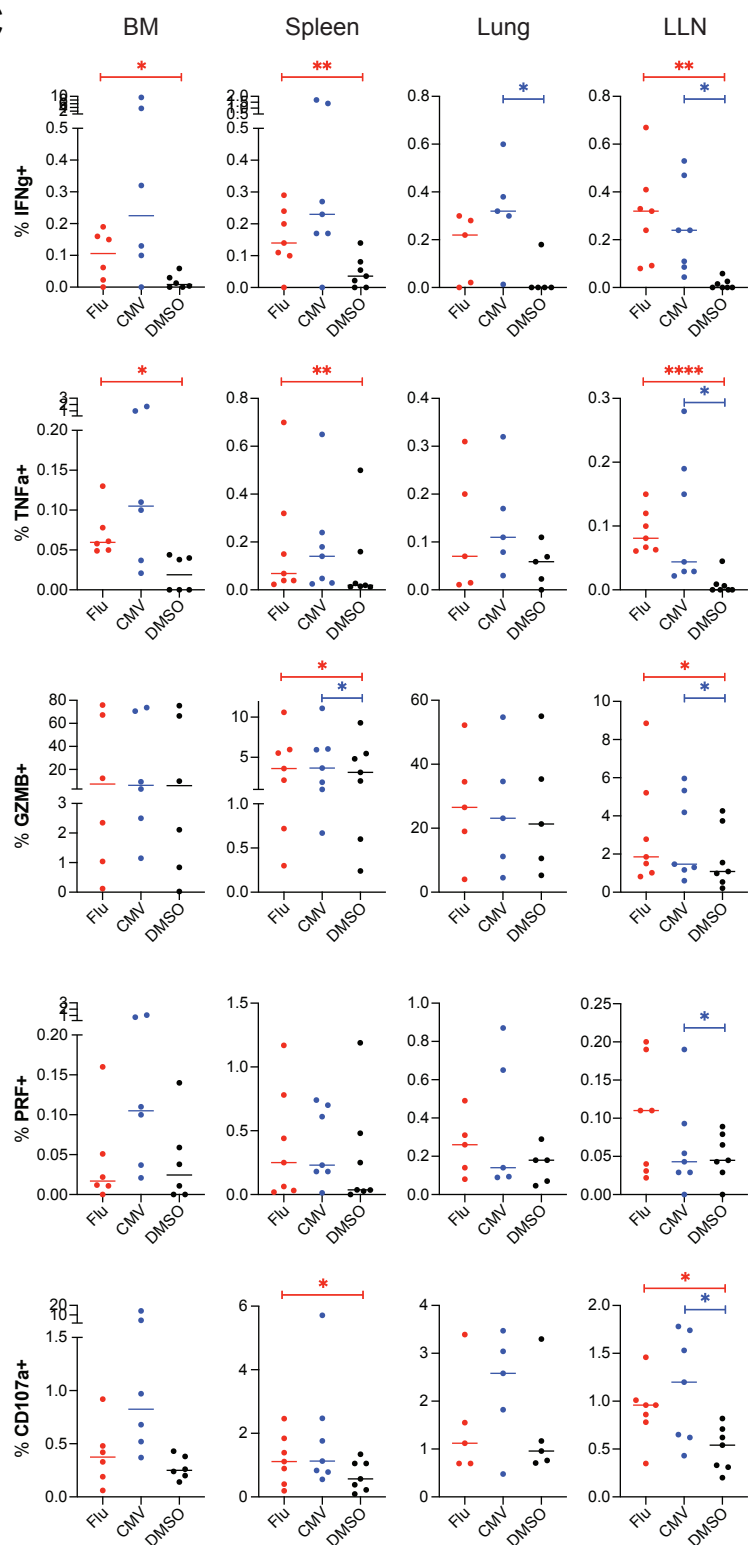

**Figure S2. Virus-specific CD8<sup>+</sup> T cell responses as measured by cytokine production following antigen stimulation in adult donors. Related to Figure 1.** (A) Gating strategy for identification of antigen-responsive CD8<sup>+</sup> T cells. CD8<sup>+</sup> T cell response was measured via production of cytokines IFN- $\gamma$ , TNF- $\alpha$ , GZMB, PRF and expression of functional marker CD107a. (B) Dot plots showing frequency of Flu-specific (red) and CMV-specific (blue) CD8<sup>+</sup> T cells that exhibit either 4 functions, 3 functions, or 2 functions of CD8<sup>+</sup> T cells effector response. (C) Dot plots showing frequency of Flu-specific (red) and CMV-specific (blue) CD8<sup>+</sup> T cells that produce IFN- $\gamma$ , TNF- $\alpha$ , GZMB, PRF or express CD107a. Each dot represents an individual donor. Significant significance for comparison of means was calculated by paired t test between antigen-responsive (either Flu or CMV) versus DMSO control and indicated by \*\*\*\*,  $p \leq 0.0001$ ; \*\*\*,  $p \leq 0.001$ ; \*\*,  $p \leq 0.01$ ; \*,  $p \leq 0.05$ . BM, bone marrow; LLN, lung-draining lymph node.

**A**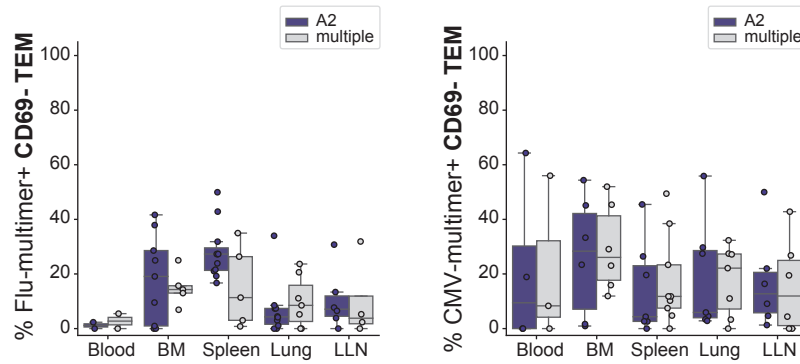**B**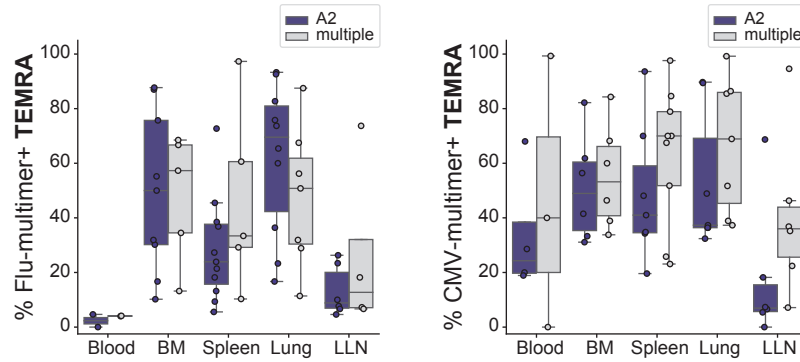**C**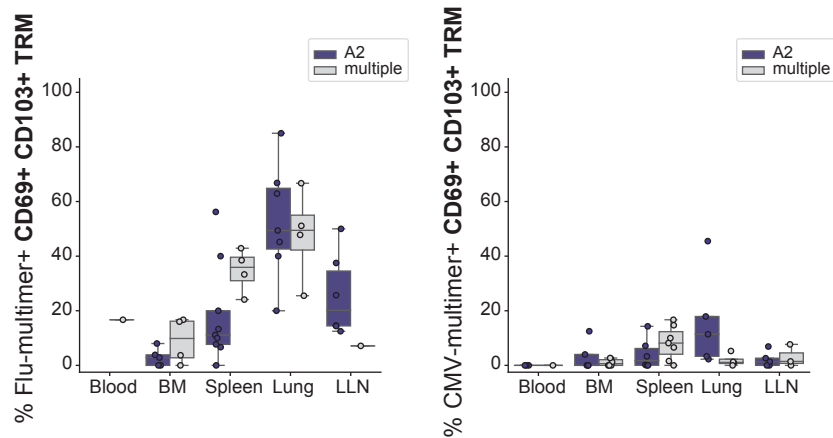

**Figure S3. Subset differentiation and tissue residency of antigen-specific CD8<sup>+</sup> T cells identified using only HLA-A2 multimers versus a combination of multiple HLA-multimers. Related to Figures 1-3.** (A, B) Frequencies of Flu-multimer<sup>+</sup> (left) and CMV-multimer<sup>+</sup> (right) CD8<sup>+</sup> T cells maintained as CD69<sup>-</sup> TEM (A) and TEMRA (B) obtained from donors using multimers containing HLA-A2 only (dark gray; n=2-11) compared to using a combination of multiple HLA-multimers (light gray, n=2-9). (C) Frequencies of Flu-multimer<sup>+</sup> (left) and CMV-multimer<sup>+</sup> (right) CD69<sup>+</sup> CD103<sup>+</sup> CD8<sup>+</sup> TRM obtained from donors using multimers containing HLA-A2 only (dark gray; n=3-9) compared to using a combination of multiple HLA-multimers (light gray, n=1-7). Statistical significance for comparison of means was calculated by unpaired t test. No comparisons were statistically significant. BM, bone marrow; LLN, lung-draining lymph node.



**A**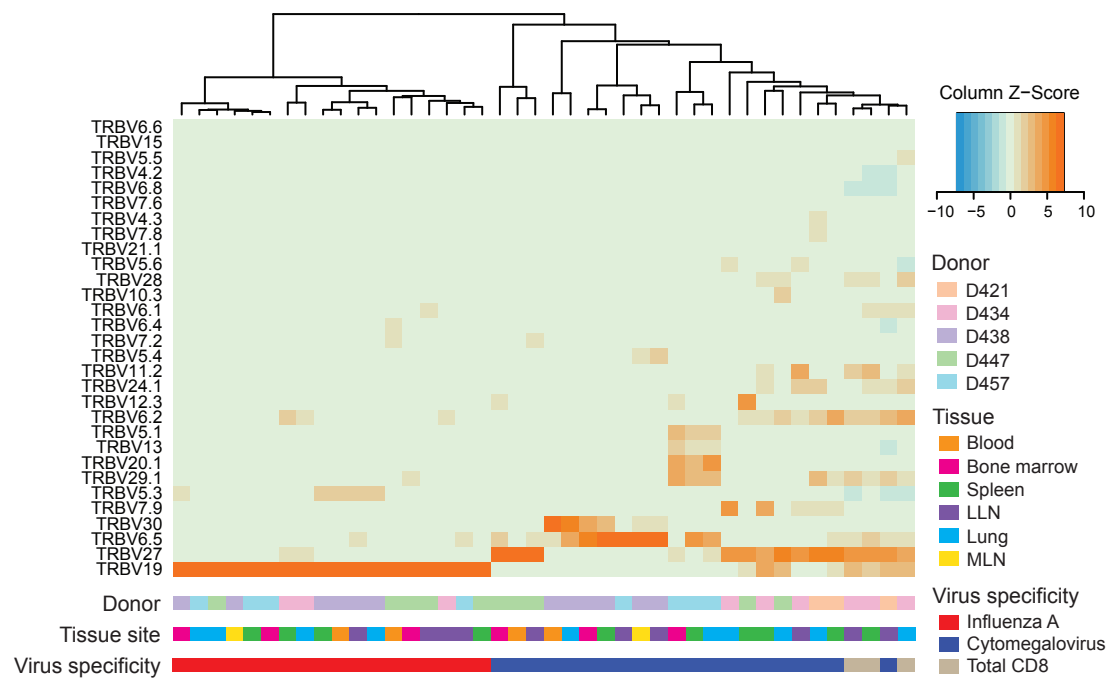**B**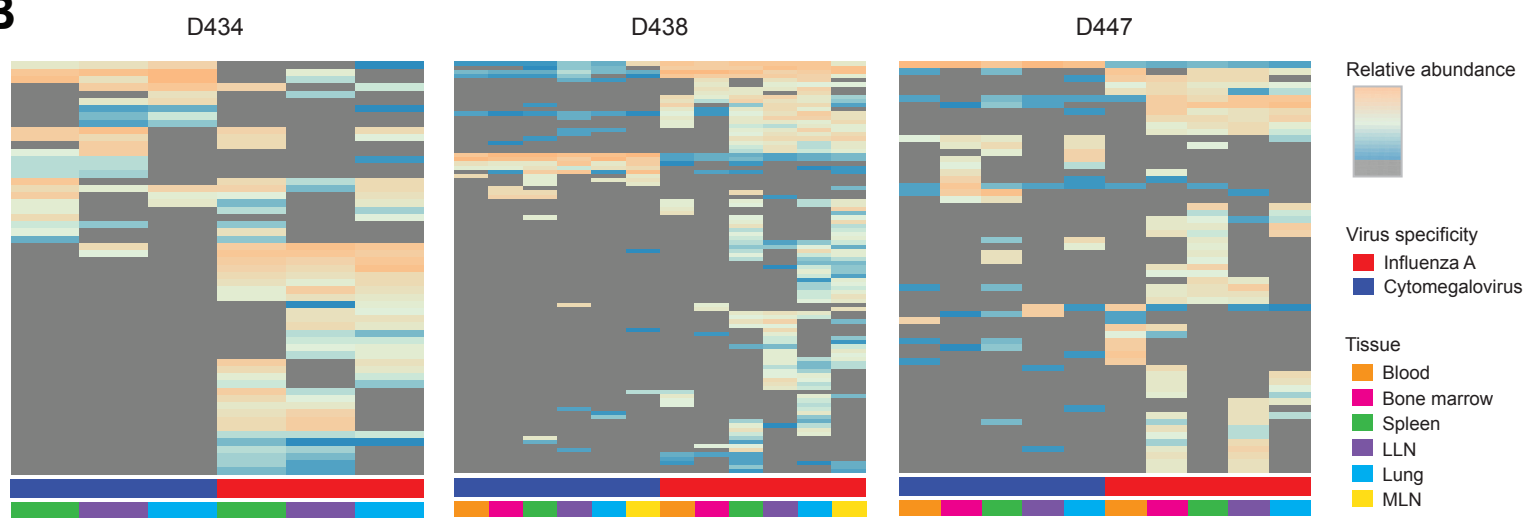**C**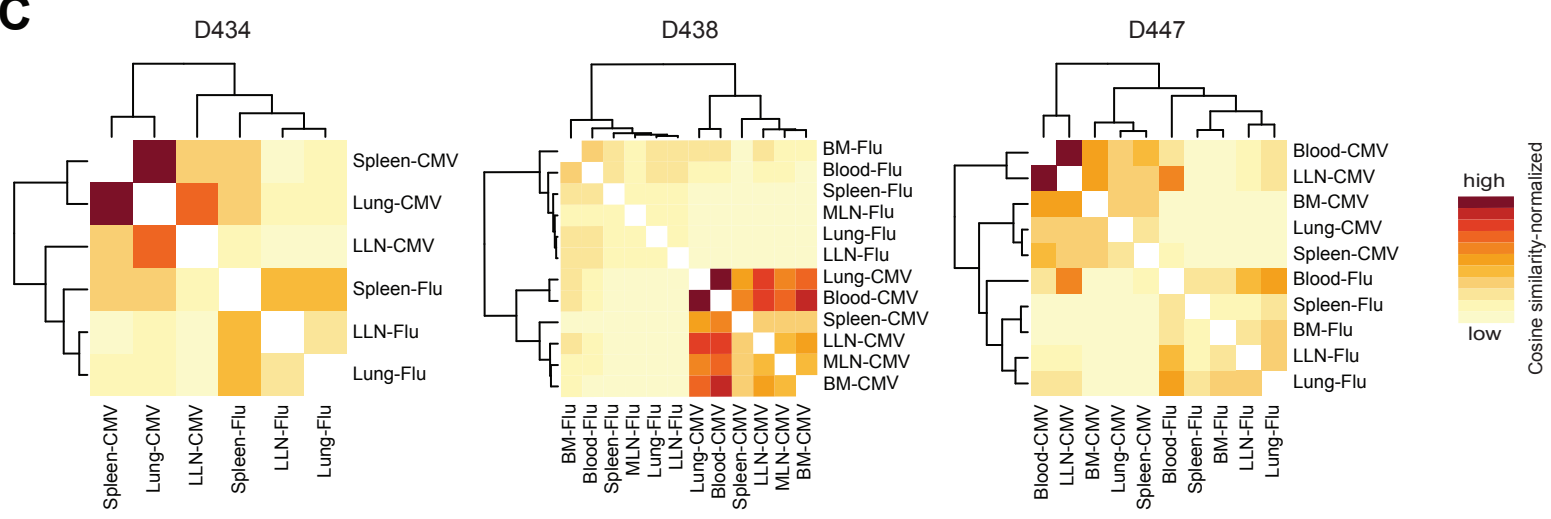

**Figure S4. *TRBV* gene usage, clonal overlap, and cosine similarity of virus-specific CD8<sup>+</sup> T cell clones across multiple tissue sites. Related to Figure 6.** (A) *TRBV* gene usage of CD8<sup>+</sup> T cell clones from individual samples with donor, tissue, and virus specificity indicated by color bars beneath each heatmap. Color intensity of each cell is based on column z-score. Each unique clone is counted once per donor. (B) Heatmaps showing the relative abundance of shared clones among Flu-specific and CMV-specific CD8<sup>+</sup> T cells in indicated tissues obtained from donor D434 (left), D438 (middle), and D447 (right). Color intensity of each cell is based on the relative abundance of a particular T cell clone within a tissue site. (C) Heatmaps showing cosine similarity between pairwise cell populations of Flu-specific and CMV-specific CD8<sup>+</sup> T cell clones in indicated tissues of donors D434 (left), D438 (middle), and D447 (right). Color intensity of each cell is based on the normalization of (min-max scaled) values of samples for a given donor. BM, bone marrow; LLN, lung-draining lymph node; MLN, mesenteric lymph node.

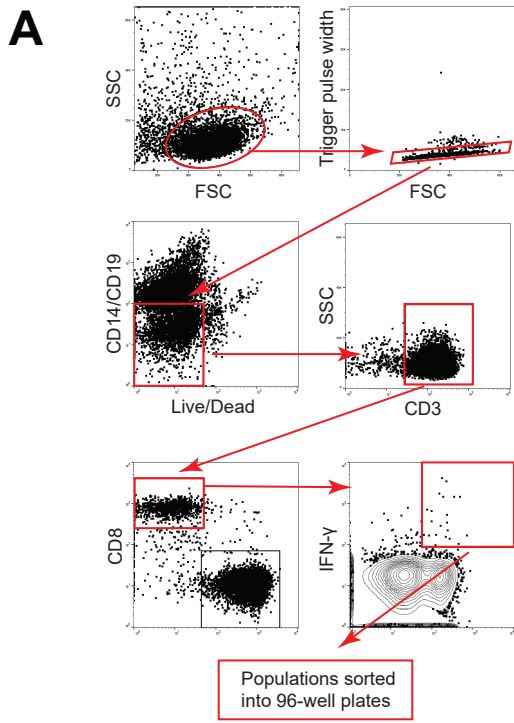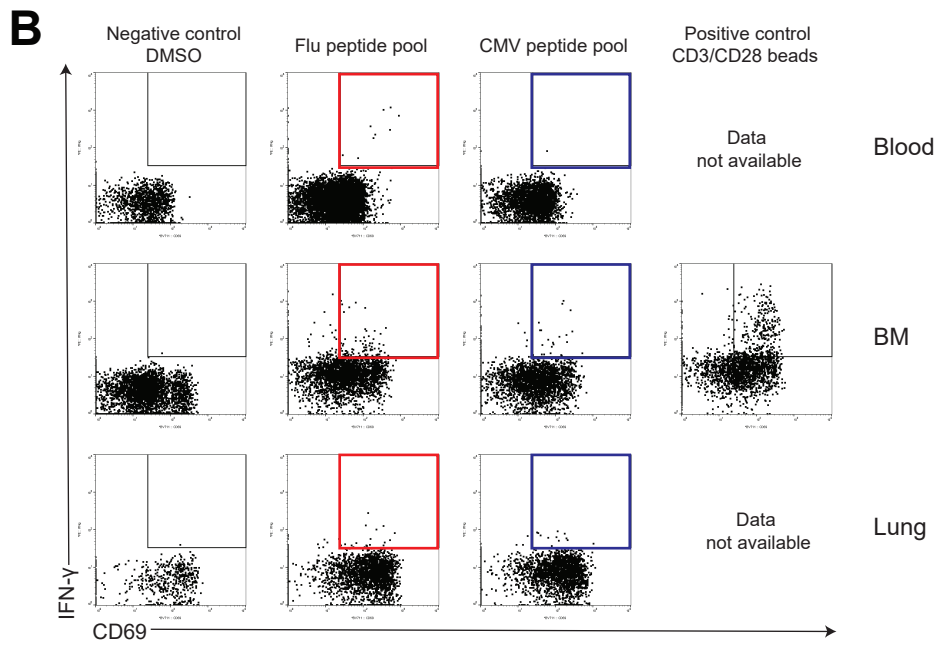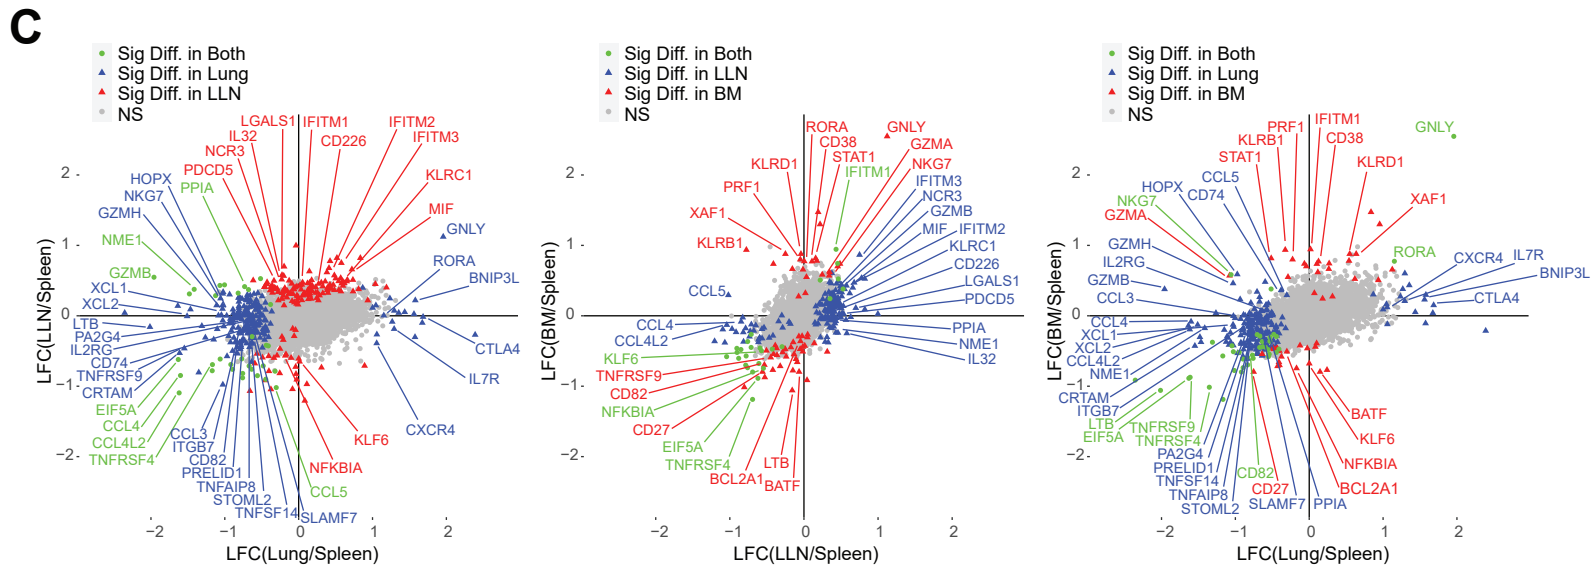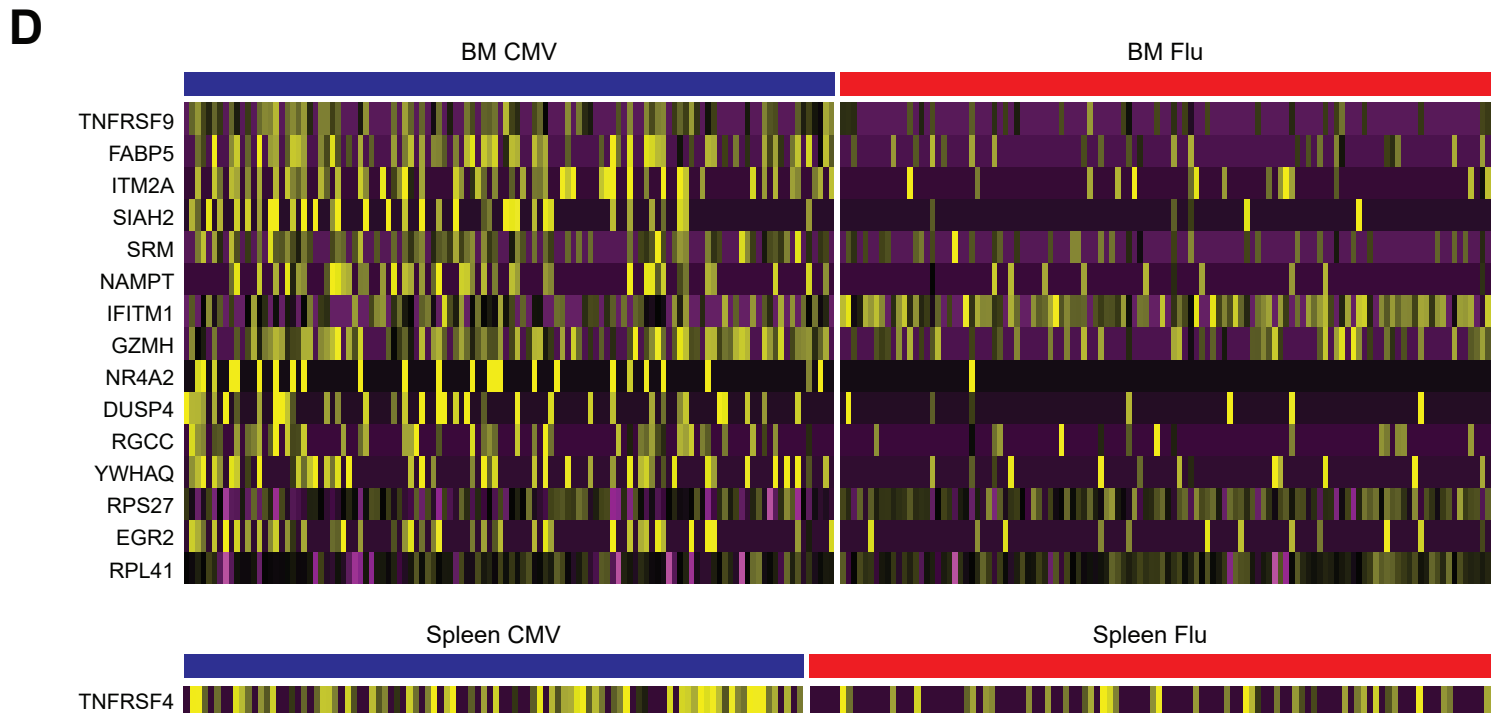

**Figure S5. PLATE-seq analysis of Flu- and CMV-specific CD8<sup>+</sup> T cell function following stimulation with viral peptide pools. Related to Figure 7.** (A) Strategy for sorting viral antigen-responsive T cells in different sites (live CD14<sup>-</sup>CD19<sup>-</sup>CD3<sup>+</sup>CD4<sup>-</sup>CD8<sup>+</sup>CD69<sup>+</sup>IFN- $\gamma$ <sup>+</sup> cells) isolated after 24-hour *in vitro* stimulation with Flu- or CMV-specific peptide pools (see methods). (B) Antigen-responding CD69<sup>+</sup> IFN- $\gamma$ <sup>+</sup> CD8<sup>+</sup> T cells in the blood, BM, and lung of donor D481 following stimulation by DMSO negative control, Flu antigen-specific peptide pool, CMV antigen-specific peptide pool, and anti-CD3/CD28 bead positive control, shown in representative flow cytometry plots. Colored gates (red: Flu; blue: CMV) indicate populations that were subsequently sorted for sequencing. (C) Biplots showing logFC of LLN/Spleen versus logFC of Lung/Spleen (left), logFC of BM/Spleen versus logFC of LLN/Spleen (middle), and logFC of BM/Spleen versus logFC of Lung/Spleen (right) (see methods). Significantly differentially expressed genes (padj < 0.1) are colored based on tissue site as indicated. See Table S6 for information about differentially expressed genes highlighted in biplots. (D) Heatmaps showing all differentially expressed genes (padj < 0.1) between CMV- and Flu-specific CD69<sup>+</sup> IFN- $\gamma$ <sup>+</sup> CD8<sup>+</sup> T cells in BM (top) and spleen (bottom). See Table S7. BM, bone marrow; LLN, lung-draining lymph node.

**A**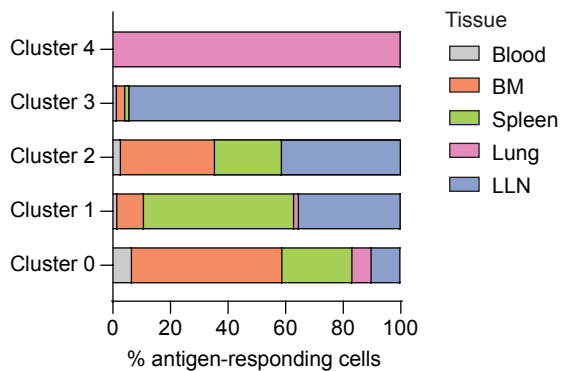**B**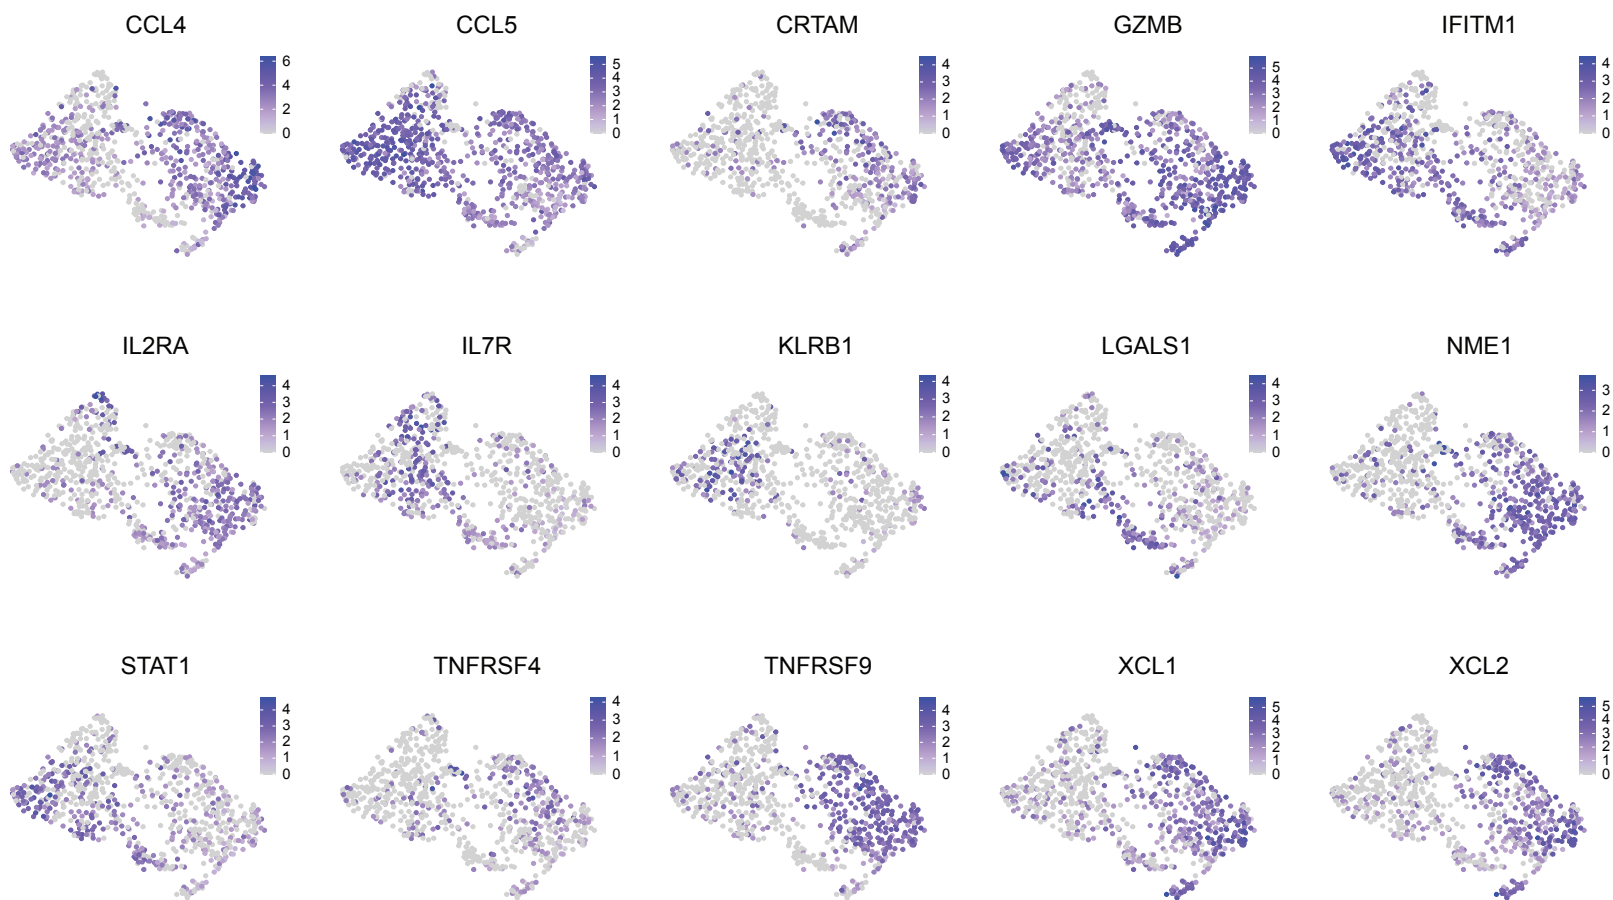

**Figure S6. Tissue distribution and gene expression across clusters identified in PLATE-seq analysis of antigen-responding CD8<sup>+</sup> T cells. Related to Figure 7.** (A) Tissue origins of antigen-responding CD8<sup>+</sup> T cells within clusters identified through differential expression analysis and unsupervised clustering. Related to Figure 7C. (B) Separate UMAP embeddings showing indicated gene expression (based on logFC) from antigen-responding CD8<sup>+</sup> T cells.

**A**

| Donor  | Age | Blood | BM | Spleen | Lung | LLN |
|--------|-----|-------|----|--------|------|-----|
| D296   | 62  |       |    |        |      |     |
| D309   | 45  |       |    |        |      |     |
| D353   | 20  |       |    |        |      |     |
| D399   | 39  |       |    |        |      |     |
| D435   | 55  |       |    |        |      |     |
| D438   | 64  |       |    |        |      |     |
| D444   | 34  |       |    |        |      |     |
| D457   | 40  |       |    |        |      |     |
| D487   | 34  |       |    |        |      |     |
| D495   | 42  |       |    |        |      |     |
| HDL094 | 11  |       |    |        |      |     |
| HDL113 | 10  |       |    |        |      |     |

**B**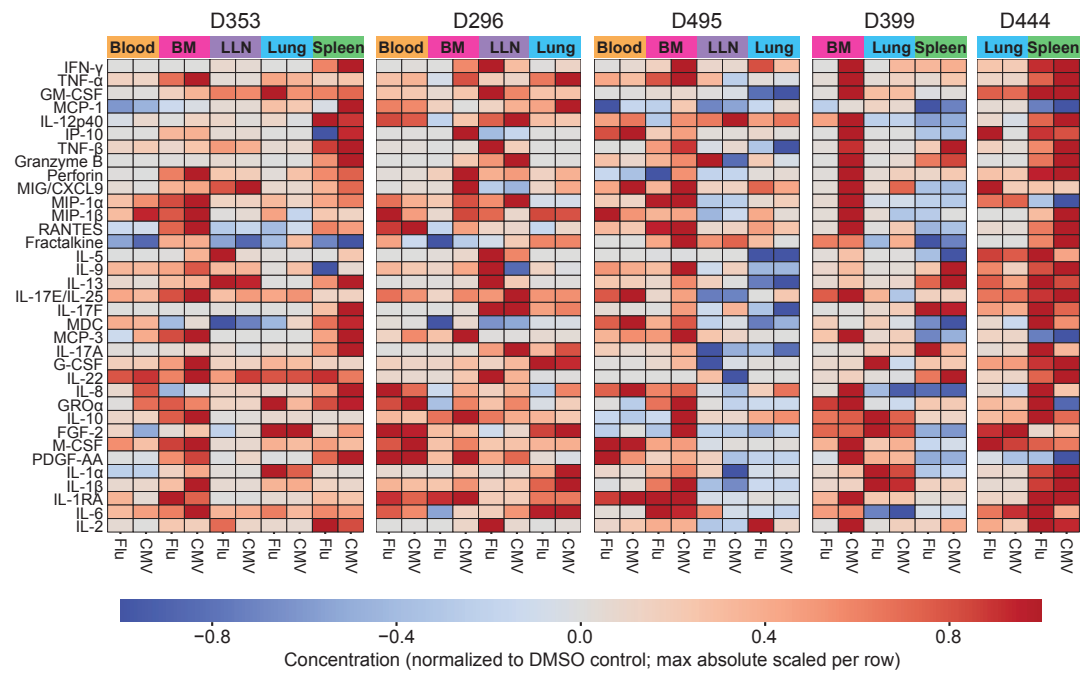**C**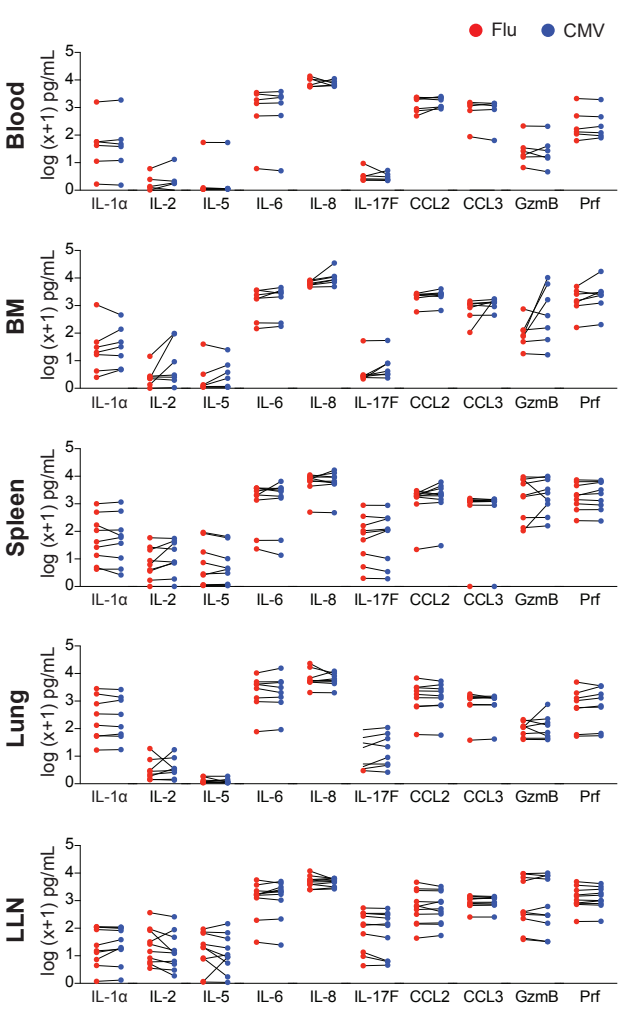**D**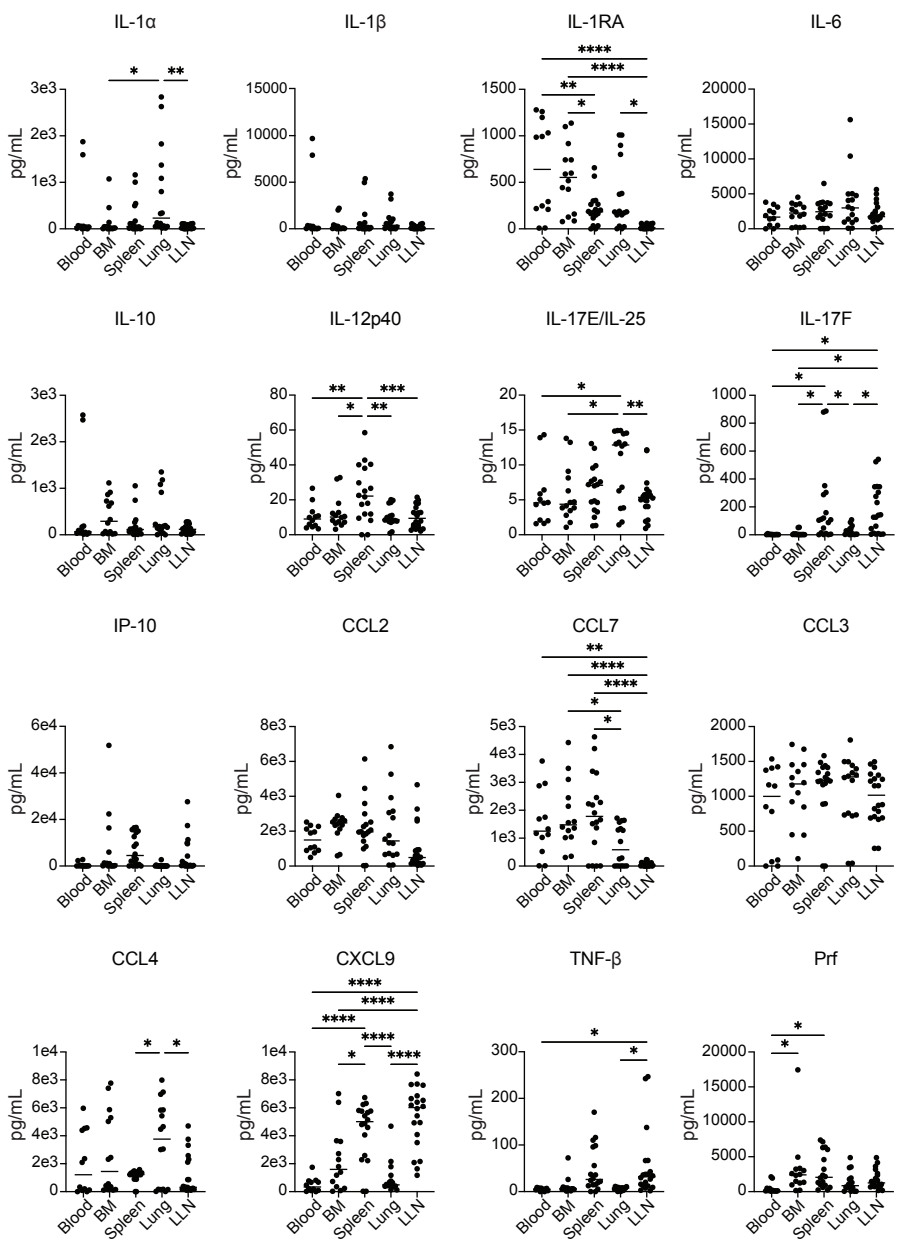

**Figure S7. Cytokine production by antigen-responding T cells following stimulation with Flu and CMV CD8 peptide pools. Related to Figure 7.** (A) Diagram outlining supernatant samples collected following *in vitro* stimulation with Flu or CMV CD8 peptide pools of single-cell suspensions from the blood, BM, spleen, lung, and LLN of 12 individual donors. (B) Heatmaps showing cytokine production profiles across multiple tissue sites within individual donors for five representative donors. Color intensity of each cell represents cytokine concentration normalized to DMSO negative control and max absolute scaled per row within each donor, with values ranging from -1 to 1 across all analytes. (C) Pairwise comparisons of  $\log(x+1)$  normalized cytokine levels in supernatants from following *in vitro* stimulation of single-cell suspensions from blood (n=6), BM (n=7), spleen (n=9), lung (n=8), and LLN (n=10) with Flu (red) or CMV (blue) peptide pools. No comparison shown was statistically significant. (D) Cytokine levels in blood, BM, spleen, lung, LLN supernatant samples. Statistical significance was calculated using one-way ANOVA followed by Tukey's multiple comparisons test indicated by \*\*\*\*,  $p \leq 0.0001$ ; \*\*\*,  $p \leq 0.001$ ; \*\*,  $p \leq 0.01$ ; \*,  $p \leq 0.05$ . BM, bone marrow; LLN, lung-draining lymph node.

| Donor                   | Age (yrs) | Sex | Ethnicity/race         | HLA-A     | HLA-B     | CMV serostatus | Assays performed*                          |
|-------------------------|-----------|-----|------------------------|-----------|-----------|----------------|--------------------------------------------|
| D25                     | 50        | F   | White                  | 2, 11     | 7, 65     | +              | Flu/CMV multimer                           |
| D97                     | 40        | M   | Black/African American | 2, 30     | 42, 58    | +              | Flu/CMV multimer                           |
| D117                    | 32        | M   | Hispanic/Latino        | 1, 2      | 35, 51    | +              | Flu/CMV multimer                           |
| D178                    | 51        | M   | Black/African American | 2, 30     | 52, 63    | -              | Flu multimer                               |
| D194                    | 53        | M   | Asian                  | 24, 29    | 7, 52     | +              | Flu/CMV multimer                           |
| D210                    | 37        | M   | Hispanic/Latino        | 2, 24     | 35, 51    | +              | Flu/CMV multimer                           |
| D217                    | 49        | M   | Black/African American | 68, 68    | 7, 42     | +              | Flu/CMV multimer                           |
| D226                    | 66        | F   | White                  | 1, 3      | 13, 35    | +              | Flu/CMV multimer                           |
| D238                    | 21        | M   | White                  | 1, 2      | 7, 8      | -              | Flu multimer                               |
| D245                    | 50        | F   | Black/African American | 1, 74     | 7, 8      | +              | Flu/CMV multimer                           |
| D282                    | 32        | F   | Hispanic/Latino        | 24, 32    | 35, 49    | +              | CMV multimer                               |
| D289                    | 58        | M   | White                  | 2, 24     | 44, 49    | +              | Flu/CMV multimer                           |
| D296                    | 62        | F   | Black/African American | 2, 3      | 7, 13     | +              | Flu/CMV multimer, cytokine profile         |
| D309                    | 45        | F   | Black/African American | Not given | Not given | +              | Cytokine profile                           |
| D324                    | 56        | M   | White                  | 2, 32     | 13, 35    | +              | Flu/CMV multimer                           |
| D331                    | 32        | M   | Black/African American | 2, 24     | 51, 60    | -              | Flu multimer                               |
| D353                    | 20        | M   | Hispanic/Latino        | 24, 24    | 35, 37    | +              | Cytokine profile                           |
| D362                    | 37        | F   | White                  | 2, 2      | 7, 62     | +              | Flu/CMV multimer                           |
| D374                    | 62        | F   | White                  | 2, 2      | 8, 78     | +              | Flu/CMV multimer                           |
| D376                    | 28        | F   | Black/African American | 1, 6601   | 44, 44    | -              | Flu multimer                               |
| D382                    | 62        | F   | Asian                  | 2, 11     | 46, 56    | +              | Flu/CMV multimer                           |
| D393                    | 55        | F   | Hispanic/Latino        | 2, 2      | 18, 44    | +              | Flu/CMV multimer                           |
| D399                    | 39        | F   | White                  | 2, 66     | 7, 58     | +              | Flu/CMV multimer, cytokine profile         |
| D400                    | 18        | M   | White                  | 2, -      | 44, 57    | +              | Flu/CMV multimer                           |
| D416                    | 37        | F   | White                  | 24, 26    | 7, 38     | +              | Flu/CMV multimer                           |
| D417                    | 78        | M   | Black/African American | 2, 24     | 41, 57    | +              | Flu/CMV multimer                           |
| D418                    | 52        | M   | Black/African American | 2, 68     | 35, 50    | -              | Flu multimer                               |
| D420                    | 34        | M   | White                  | 2, 30     | 13, 27    | +              | Flu/CMV multimer                           |
| D421                    | 18        | F   | Hispanic/Latino        | 3, 29     | 7, 44     | +              | Flu/CMV multimer                           |
| D426                    | 43        | F   | Hispanic/Latino        | 3, 68     | 7, 27     | +              | Flu/CMV multimer                           |
| D431                    | 64        | F   | Black/African American | 2, 33     | 53, 65    | +              | Flu/CMV multimer                           |
| D434                    | 46        | F   | White                  | 2, 24     | 7, 44     | +              | Flu/CMV multimer                           |
| D435                    | 55        | F   | White                  | 1, 3      | 7, 44     | +              | Flu/CMV multimer, cytokine profile         |
| D438                    | 64        | M   | Black/African American | 2, 23     | 35, 44    | +              | Flu/CMV multimer, cytokine profile, TCRseq |
| D444                    | 34        | F   | Black/African American | 2, 34     | 64, 35    | +              | Flu/CMV multimer, cytokine profile, TCRseq |
| D445                    | 47        | M   | Black/African American | 2, 33     | 63, 53    | +              | Flu/CMV multimer                           |
| D447                    | 40        | F   | Hispanic/Latino        | 2, 68     | 39, 44    | +              | Flu/CMV multimer, TCRseq                   |
| D457                    | 40        | M   | Asian                  | 2, 24     | 62, 77    | +              | Flu/CMV multimer, cytokine profile, TCRseq |
| D459                    | 52        | F   | Black/African American | 1, 3      | 53, 53    | +              | Flu/CMV multimer                           |
| D481                    | 29        | M   | Hispanic/Latino        | 3, 29     | 35, 44    | +              | PLATE-seq                                  |
| D487                    | 34        | M   | Black/African American | 2, 30     | 45, 65    | +              | Flu/CMV multimer, cytokine profile         |
| D495                    | 42        | M   | Black/African American | 23, 30    | 72, 45    | +              | Cytokine profile                           |
| <b>Pediatric Donors</b> |           |     |                        |           |           |                |                                            |
| D143                    | 6         | M   | White                  | 2, 3      | 7, 57     | -              | Flu multimer                               |
| D258                    | 1         | M   | White                  | 1, 31     | 8, 60     | -              | Flu multimer                               |
| P003                    | 9         | F   | White                  | 1, 24     | 7, 8      | +              | Flu multimer                               |
| HDL052                  | 9         | M   | White                  | 2, 24     | 7, 64     | -              | Flu multimer                               |
| HDL053                  | 2         | M   | White                  | 2, 11     | 35, 60    | +              | Flu multimer                               |
| HDL060                  | 3         | M   | White                  | 2, 24     | 18, 44    | -              | Flu multimer                               |
| HDL062                  | 4         | F   | White                  | 2, 3      | 62, 47    | -              | Flu multimer                               |
| HDL069                  | 6         | M   | Hispanic/Latino        | 1, 2      | 8, 53     | -              | Flu multimer                               |
| HDL072                  | 5         | M   | White                  | 1, 24     | 7, 50     | -              | Flu multimer                               |
| HDL081                  | 8         | M   | White                  | 2, 3      | 7, 62     | +              | Flu multimer                               |
| HDL094                  | 11        | M   | White                  | 1, 2      | 27, 37    | +              | Flu multimer, cytokine profile             |
| HDL098                  | 10        | M   | Hispanic/Latino        | 2, 2      | 35, 52    | +              | Flu multimer                               |
| HDL099                  | 4         | M   | White                  | 1, 2      | 13, 62    | +              | Flu multimer                               |
| HDL101                  | 9         | M   | Unknown                | 2, 3      | 7, 45     | -              | Flu multimer                               |
| HDL102                  | 2         | F   | Hispanic/Latino        | 2, 24     | 44, 61    | +              | Flu multimer                               |
| HDL113                  | 10        | M   | Hispanic/Latino        | 2, -      | 51, 52    | +              | Flu multimer, cytokine profile             |

\*Multimer assays include phenotyping for T cell subset differentiation and tissue residency

**Table S1. Related to Figures 1- 7. Information about donors in this study.**



| Sample name         | # of cells sorted | # of clones | DNA (ng) |
|---------------------|-------------------|-------------|----------|
| D421_Spleen_CMV     | 4000              | 324         | 5.93     |
| D421_LLN_CMV        | 3000              | 1407        | 14.43    |
| D421_Lung_CMV       | 54000             | 1017        | 89.70    |
| D434_Spleen_CMV     | 361               | 47          | 1.03     |
| D434_Spleen_Flu     | 444               | 61          | 1.47     |
| D434_Spleen_BulkCD8 | 10000             | 1672        | 19.37    |
| D434_LLN_CMV        | 343               | 90          | <1       |
| D434_LLN_Flu        | 838               | 108         | 1.69     |
| D434_LLN_BulkCD8    | 10000             | 2484        | 18.07    |
| D434_Lung_CMV       | 296               | 30          | <1       |
| D434_Lung_Flu       | 1233              | 102         | 3.04     |
| D434_Lung_BulkCD8   | 10000             | 1144        | 18.20    |
| D438_Blood_CMV      | 572               | 31          | <1       |
| D438_Blood_Flu      | 3769              | 86          | 2.78     |
| D438_BM_CMV         | 646               | 51          | <1       |
| D438_BM_Flu         | 1366              | 56          | 1.68     |
| D438_Spleen_CMV     | 1575              | 78          | 2.13     |
| D438_Spleen_Flu     | 6096              | 155         | 7.80     |
| D438_LLN_CMV        | 159               | 39          | <1       |
| D438_LLN_Flu        | 2906              | 107         | 1.94     |
| D438_Lung_CMV       | 494               | 59          | <1       |
| D438_Lung_Flu       | 17071             | 184         | 17.16    |
| D438_MLN_CMV        | 1842              | 68          | 1.74     |
| D438_MLN_Flu        | 8049              | 199         | 8.45     |
| D447_Blood_CMV      | 330               | 28          | <1       |
| D447_Blood_Flu      | 108               | 33          | <1       |
| D447_BM_CMV         | 2300              | 58          | 2.98     |
| D447_BM_Flu         | 1185              | 134         | <1       |
| D447_LLN_CMV        | 180               | 38          | <1       |
| D447_LLN_Flu        | 240               | 56          | <1       |
| D447_Lung_CMV       | 366               | 66          | <1       |
| D447_Lung_Flu       | 2448              | 63          | 2.33     |
| D447_Spleen_CMV     | 199               | 70          | <1       |
| D447_Spleen_Flu     | 633               | 140         | <1       |
| D457_BM_CMV         | 38683             | 350         | 12.98    |
| D457_BM_Flu         | 3249              | 285         | 6.83     |
| D457_LLN_CMV        | 15175             | 429         | 27.00    |
| D457_LLN_Flu        | 9251              | 1000        | 4.80     |
| D457_Lung_CMV       | 31935             | 975         | 9.30     |
| D457_Lung_Flu       | 47451             | 691         | 8.93     |
| D457_Spleen_CMV     | 17818             | 565         | 31.73    |
| D457_Spleen_Flu     | 3022              | 286         | 39.75    |

**Table S2. Related to Figure 6.** TCR sequencing sample names, cells sorted, number of clones, and DNA.
